# Supplementary material for: Burden in parents of school-aged children during different phases of the COVID-19 pandemic in Germany: an analysis within the COVID-19 snapshot monitoring (COSMO) study
Source: Bundesgesundheitsblatt Gesundheitsforschung Gesundheitsschutz. 2021 Nov 26;64(12):1500–11. [Article in German] doi: 10.1007/s00103-021-03453-3 (PMC8617549; doi:10.1007/s00103-021-03453-3)
Supplement: Supplementary file 1 [file 103_2021_3453_MOESM1_ESM.pdf]

Onlinematerial zum Beitrag:

## **Belastung von Eltern mit Kindern im Schulalter während verschiedener Phasen der COVID-19-Pandemie in Deutschland: Eine Analyse der COVID-19 Snapshot Monitoring (COSMO)-Daten**

Julia Elisabeth Rabe<sup>1,2,3</sup>, Hannah Schillok<sup>1,2</sup>, Christina Merkel<sup>4</sup>, Stephan Voss<sup>1,2</sup>, Michaela Coenen<sup>1,2</sup>, Freia De Bock<sup>4</sup>, Ursula von Rüden<sup>4</sup>, Anke Bramesfeld<sup>3</sup>, Caroline Jung-Sievers<sup>1,2</sup>, COSMO-Gruppe\*

<sup>1</sup> Institut für Medizinische Informationsverarbeitung, Biometrie und Epidemiologie (IBE), Lehrstuhl für Public Health und Versorgungsforschung, Ludwig-Maximilians-Universität (LMU) München, München, Deutschland

<sup>2</sup> Pettenkofer School of Public Health München, München, Deutschland

<sup>3</sup> Institut für Epidemiologie, Sozialmedizin und Gesundheitssystemforschung, Medizinische Hochschule Hannover, Hannover, Deutschland

<sup>4</sup> Bundeszentrale für gesundheitliche Aufklärung (BZgA), Köln, Deutschland

\*Die Mitglieder der COSMO-Gruppe sind in der Danksagung aufgeführt.

### **Korrespondenzadresse:**

Dr. Ursula von Rüden  
Referat Q3 - Evaluation, Methoden, Forschungsdaten  
Bundeszentrale für gesundheitliche Aufklärung (BZgA)  
Maarweg 149-165  
50825 Köln  
Deutschland  
[ursula.von-rueden@bzga.de](mailto:ursula.von-rueden@bzga.de)

### **Inhalte:**

**Abbildung A1:** Elternspezifische Belastung in Welle 12 und 30

**Abbildung A2:** Vergleich elternspezifischer Belastungen stratifiziert nach Geschlecht in Welle 30

**Tabelle A1:** Soziodemografische und gesundheitsbezogenen Angaben für Eltern mit Kindern im Alter von 0 bis 5 Jahren sowie für Teilnehmende ohne minderjährige Kinder in den Wellen 5, 15 und 34.

**Tabelle A2:** Vergleich der Belastung innerhalb der Wellen 5, 15 und 34, inkl. absoluter und relativer Häufigkeiten sowie Cramers V und p-Werten für die näherungsweise Signifikanz.

**Tabelle A3:** Vergleich der Belastung innerhalb der Hauptgruppen zwischen den Wellen 5, 15 und 34, inkl. Odds Ratios (OR) und 95% Konfidenzintervallen (95% KI).

**Tabelle A4:** Multivariate logistische Regression für die Belastung in verschiedenen Subgruppen von Eltern mit Kindern im Schulalter mit den Kovariablen Alter, Geschlecht, Schulbildung und Migrationshintergrund.

**Tabelle A5:** Vergleich elternspezifischer Belastungen zwischen Müttern und Vätern von Kindern im Schulalter in Welle 12 durch den Mann-Whitney-U-Test.

**Tabelle A6:** Vergleich elternspezifischer Belastungen zwischen Müttern und Vätern von Kindern im Schulalter in Welle 30 durch den Mann-Whitney-U-Test.

### Abbildung A1 – Elternspezifische Belastung in Welle 12 und 30

Boxplot-Diagramme für das Variablenset zu elternspezifischer Belastung in Welle 12 (Mai 2020) und Welle 30 (Dezember 2020). Antwortmöglichkeiten für die ersten beiden Items waren 1 - „Trifft überhaupt nicht zu“ bis 7 – „Trifft vollständig zu“, sowie 1 „Gar nicht herausfordernd“ bis 7 – „Äußerst herausfordernd“ für die verbleibenden acht Items.

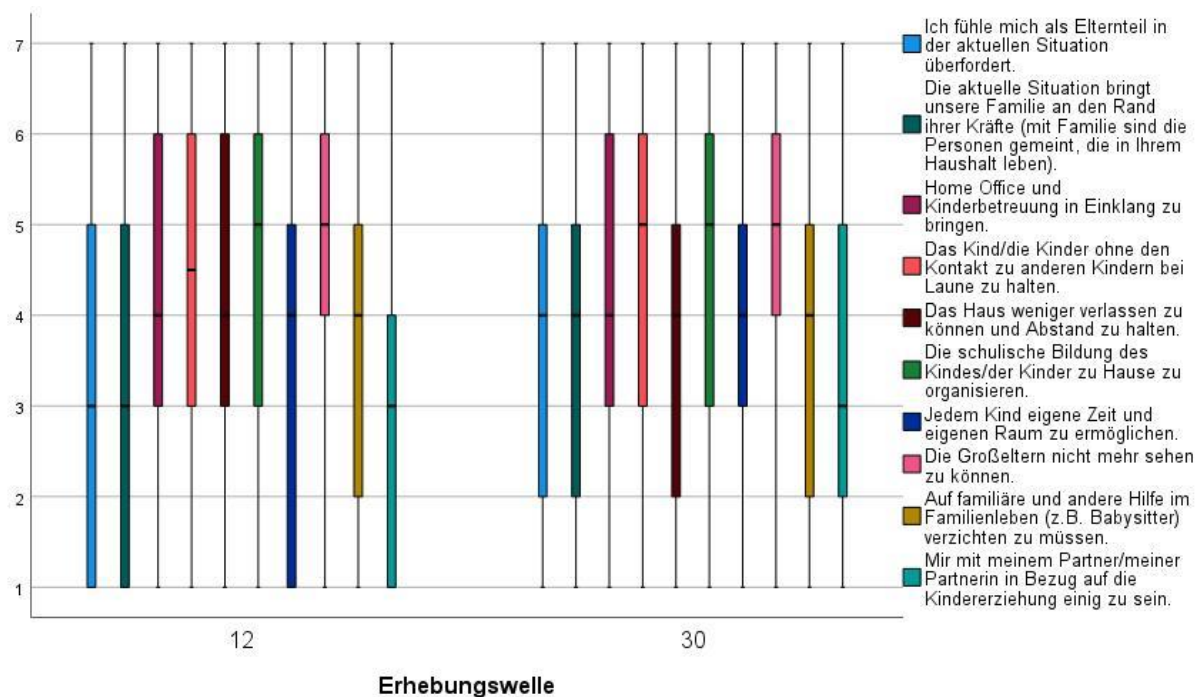

### Abbildung A2 – Vergleich elternspezifischer Belastungen stratifiziert nach Geschlecht in Welle 30

Boxplot-Diagramme für das Variablenset zu elterlicher Belastung für Mütter im Vergleich zu Vätern von Kindern im Schulalter in Welle 30 (Dezember 2020). Antwortmöglichkeiten für die ersten beiden Items waren 1 - „Trifft überhaupt nicht zu“ bis 7 – „Trifft vollständig zu“, sowie 1 „Gar nicht herausfordernd“ bis 7 – „Äußerst herausfordernd“ für die verbleibenden acht Items. Signifikante Unterschiede aus den Mann-Whitney-U-Tests sind mit „\*“ markiert.

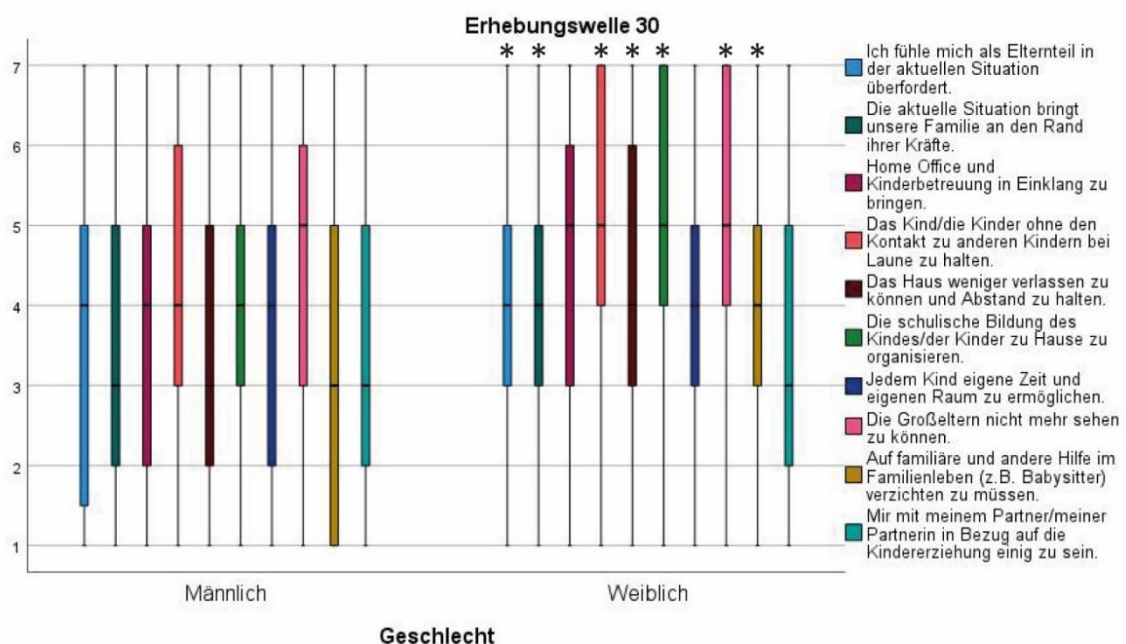

**Tabelle A1: Soziodemografische und gesundheitsbezogenen Angaben für Eltern mit Kindern im Alter von 0 bis 5 Jahren sowie für Teilnehmende ohne minderjährige Kinder in den Wellen 5, 15 und 34.** MW: Mittelwert. SD: Standardabweichung. n.e.: nicht erhoben.

<sup>a</sup>. Hier hat sich der Modus der Datenerhebung im Laufe des Projekts geändert (COSMO Wellen 5 und 15: "Ja, Diagnose bestätigt", "Ja, Diagnose noch nicht bestätigt", "Ja, überstanden", "Nein" und "Weiß nicht", Welle 34: "Ja", "Nein").

| Stichproben-<br>beschreibung                       | Welle 5 (31. März/ 1. April 2020) |        |                                       |        | Welle 15 (23./24. Juni 2020) |        |                                       |        | Welle 34 (26./27. Januar 2021) |        |                                       |        |
|----------------------------------------------------|-----------------------------------|--------|---------------------------------------|--------|------------------------------|--------|---------------------------------------|--------|--------------------------------|--------|---------------------------------------|--------|
|                                                    | Eltern mit<br>Kindern 0-5 J.      |        | Teilnehmende<br>ohne Kinder <18<br>J. |        | Eltern mit<br>Kindern 0-5 J. |        | Teilnehmende<br>ohne Kinder <18<br>J. |        | Eltern mit<br>Kindern 0-5 J.   |        | Teilnehmende<br>ohne Kinder <18<br>J. |        |
|                                                    | n/MW                              | %/SD   | n/MW                                  | %/SD   | n/MW                         | %/SD   | n/MW                                  | %/SD   | n/MW                           | %/SD   | n/MW                                  | %/SD   |
| Total                                              | 131                               | 100,0% | 744                                   | 100,0% | 162                          | 100,0% | 698                                   | 100,0% | 154                            | 100,0% | 716                                   | 100,0% |
| <b>Geschlecht</b>                                  |                                   |        |                                       |        |                              |        |                                       |        |                                |        |                                       |        |
| Männlich                                           | 60                                | 45,8 % | 364                                   | 48,9 % | 66                           | 40,7 % | 350                                   | 50,1 % | 79                             | 51,3 % | 360                                   | 50,3 % |
| Weiblich                                           | 71                                | 54,2 % | 380                                   | 51,1 % | 96                           | 59,3 % | 348                                   | 49,9 % | 75                             | 48,7 % | 356                                   | 49,7 % |
| <b>Alter der<br/>Teilnehmenden (in<br/>Jahren)</b> |                                   |        |                                       |        |                              |        |                                       |        |                                |        |                                       |        |
| Alter der<br>Teilnehmenden<br>(kategorial)         |                                   |        |                                       |        |                              |        |                                       |        |                                |        |                                       |        |
| 18-29 J.                                           | 31                                | 23,7 % | 161                                   | 21,6 % | 35                           | 21,6 % | 136                                   | 19,5 % | 31                             | 20,1 % | 150                                   | 20,9 % |
| 30-39 J.                                           | 57                                | 43,5 % | 71                                    | 9,5 %  | 83                           | 51,2 % | 99                                    | 14,2 % | 90                             | 58,4 % | 121                                   | 16,9 % |
| 40-49 J.                                           | 31                                | 23,7 % | 125                                   | 16,8 % | 31                           | 19,1 % | 78                                    | 11,2 % | 18                             | 11,7 % | 76                                    | 10,6 % |
| 50+ J.                                             | 12                                | 9,2 %  | 387                                   | 52,0 % | 13                           | 8,0 %  | 385                                   | 55,2 % | 15                             | 9,7 %  | 369                                   | 51,5 % |
| <b>Alleinerziehend</b>                             |                                   |        |                                       |        |                              |        |                                       |        |                                |        |                                       |        |
| Ja                                                 | 16                                | 12,2 % | -                                     | -      | 20                           | 12,3 % | -                                     | -      | 15                             | 9,7 %  | -                                     | -      |
| Nein                                               | 115                               | 87,8 % | -                                     | -      | 142                          | 87,7 % | -                                     | -      | 139                            | 90,3 % | -                                     | -      |
| <b>Dauer der<br/>Schulbildung</b>                  |                                   |        |                                       |        |                              |        |                                       |        |                                |        |                                       |        |
| Bis zu 9 J.                                        | 11                                | 8,4 %  | 84                                    | 11,3 % | 18                           | 11,1 % | 84                                    | 12,0 % | 14                             | 9,1 %  | 94                                    | 13,1 % |
| Mind. 10 J., ohne<br>Abitur                        | 24                                | 18,3 % | 287                                   | 38,6 % | 41                           | 25,3 % | 247                                   | 35,4 % | 40                             | 26,0 % | 225                                   | 31,4 % |
| Mind. 10 J., mit<br>Abitur                         | 96                                | 73,3 % | 373                                   | 50,1 % | 103                          | 63,6 % | 367                                   | 52,6 % | 100                            | 64,9 % | 397                                   | 55,4 % |
| <b>Erwerbstätig</b>                                |                                   |        |                                       |        |                              |        |                                       |        |                                |        |                                       |        |
| Ja                                                 | n.e.                              | n.e.   | n.e.                                  | n.e.   | 126                          | 77,8 % | 422                                   | 60,5 % | 131                            | 85,1 % | 448                                   | 62,6 % |
| Nein                                               | n.e.                              | n.e.   | n.e.                                  | n.e.   | 36                           | 22,2 % | 276                                   | 39,5 % | 23                             | 14,9 % | 268                                   | 37,4 % |
| <b>Nettohaushalts-<br/>einkommen</b>               |                                   |        |                                       |        |                              |        |                                       |        |                                |        |                                       |        |
| <1.250€                                            | n.e.                              | n.e.   | n.e.                                  | n.e.   | 9                            | 5,6 %  | 126                                   | 18,1 % | 5                              | 3,2 %  | 102                                   | 14,2 % |
| 1.250-2.249                                        | n.e.                              | n.e.   | n.e.                                  | n.e.   | 39                           | 24,1 % | 188                                   | 26,9 % | 34                             | 22,1 % | 190                                   | 26,5 % |
| 2.250-3.999                                        | n.e.                              | n.e.   | n.e.                                  | n.e.   | 71                           | 43,8 % | 218                                   | 31,2 % | 73                             | 47,4 % | 238                                   | 33,2 % |
| 4.000+                                             | n.e.                              | n.e.   | n.e.                                  | n.e.   | 34                           | 21,0 % | 101                                   | 14,5 % | 31                             | 20,1 % | 128                                   | 17,9 % |
| Keine Angabe                                       | n.e.                              | n.e.   | n.e.                                  | n.e.   | 9                            | 5,6 %  | 65                                    | 9,3 %  | 11                             | 7,1 %  | 658                                   | 91,9 % |
| <b>Migrations-<br/>hintergrund</b>                 |                                   |        |                                       |        |                              |        |                                       |        |                                |        |                                       |        |
| Ja                                                 | 30                                | 22,9 % | 94                                    | 12,6 % | 40                           | 24,7 % | 91                                    | 13,0 % | 36                             | 23,4 % | 135                                   | 18,9 % |
| Nein                                               | 100                               | 76,3 % | 648                                   | 87,1 % | 121                          | 74,7 % | 606                                   | 86,8 % | 118                            | 76,6 % | 580                                   | 81,0 % |
| Weiß nicht                                         | 1                                 | 0,8 %  | 2                                     | 0,3 %  | 1                            | 0,6 %  | 1                                     | 0,1 %  | -                              | -      | 1                                     | 0,1 %  |
| <b>Haushaltsgröße</b>                              |                                   |        |                                       |        |                              |        |                                       |        |                                |        |                                       |        |
| Nur ich                                            | 8                                 | 6,1 %  | 249                                   | 33,5 % | 11                           | 6,8 %  | 247                                   | 35,4 % | 12                             | 7,8 %  | 212                                   | 29,6 % |
| 2 Personen                                         | 15                                | 11,5 % | 363                                   | 48,8 % | 21                           | 13,0 % | 350                                   | 50,1 % | 14                             | 9,1 %  | 378                                   | 52,8 % |
| 3-4 Personen                                       | 88                                | 67,2 % | 120                                   | 16,1 % | 108                          | 66,7 % | 85                                    | 12,2 % | 100                            | 64,9 % | 108                                   | 15,1 % |
| 5 oder mehr Pers.                                  | 20                                | 15,3 % | 12                                    | 1,6 %  | 22                           | 13,6 % | 16                                    | 2,3 %  | 26                             | 16,9 % | 17                                    | 2,4 %  |
| Keine Angabe                                       | 0                                 | 0,0 %  | 0                                     | 0,0 %  | 0                            | 0,0 %  | 0                                     | 0,0 %  | 2                              | 1,3 %  | 1                                     | 0,1 %  |
| <b>Chronische<br/>Erkrankung</b>                   |                                   |        |                                       |        |                              |        |                                       |        |                                |        |                                       |        |
| Ja                                                 | 22                                | 16,8 % | 263                                   | 35,3 % | 38                           | 23,5 % | 253                                   | 36,2 % | 30                             | 19,5 % | 259                                   | 36,2 % |
| Nein                                               | 100                               | 76,3 % | 454                                   | 61,0 % | 121                          | 74,7 % | 428                                   | 61,3 % | 120                            | 77,9 % | 431                                   | 60,2 % |
| Weiß nicht                                         | 9                                 | 6,9 %  | 27                                    | 3,6 %  | 3                            | 1,9 %  | 17                                    | 2,4 %  | 4                              | 2,6 %  | 26                                    | 3,6 %  |

| Zugehörigkeit zur Risikogruppe für COVID-19                 |      |        |      |        |     |        |     |        |     |        |     |        |
|-------------------------------------------------------------|------|--------|------|--------|-----|--------|-----|--------|-----|--------|-----|--------|
| Ja                                                          | n.e. | n.e.   | n.e. | n.e.   | 40  | 24,7 % | 416 | 59,6 % | 27  | 17,5 % | 289 | 40,4 % |
| Nein                                                        | n.e. | n.e.   | n.e. | n.e.   | 122 | 75,3 % | 282 | 40,4 % | 117 | 76,0 % | 372 | 52,0 % |
| Weiß nicht                                                  | n.e. | n.e.   | n.e. | n.e.   | 0   | 0,0 %  | 0   | 0,0 %  | 10  | 6,5 %  | 55  | 7,7 %  |
| <b>Eigene COVID-19 Infektion (5&amp;15/34) <sup>a</sup></b> |      |        |      |        |     |        |     |        |     |        |     |        |
| Ja, bestätigt/ Ja                                           | 3    | 2,3 %  | 2    | 0,3 %  | 2   | 1,2 %  | 3   | 0,4 %  | 15  | 9,7 %  | 32  | 4,5 %  |
| Ja, noch nicht bestätigt/ Nein                              | 5    | 3,8 %  | 4    | 0,5 %  | 4   | 2,5 %  | 3   | 0,4 %  | 139 | 90,3 % | 684 | 95,5 % |
| Nein / -                                                    | 102  | 77,9 % | 634  | 85,2 % | 137 | 84,6 % | 638 | 91,4 % | -   | -      | -   | -      |
| Ja, genesen / -                                             | n.e. | n.e.   | n.e. | n.e.   | 1   | 0,6 %  | 3   | 0,4 %  | -   | -      | -   | -      |
| Weiß nicht / -                                              | 21   | 16,0 % | 104  | 14,0 % | 18  | 11,1 % | 51  | 7,3 %  | -   | -      | -   | -      |

**Tabelle A2: Vergleich der Belastung innerhalb der Wellen 5, 15 und 34, inkl. absoluter und relativer Häufigkeiten sowie Cramers V und p-Werten für die näherungsweise Signifikanz. Signifikante Ergebnisse sind fett gedruckt (p<0.05).**

| Welle 5                    | Gruppen-<br>größe (N) | Belastung<br>= „Ja“ (n) | Belastung<br>= „Ja“ (%) | Cramers<br>V | Näherungsw.<br>Signifikanz |
|----------------------------|-----------------------|-------------------------|-------------------------|--------------|----------------------------|
| Eltern von Kindern 0-5 J.  | 131                   | 77                      | 58,8%                   | 0,05         | 0,09                       |
| Eltern von Kindern 6-17 J. | 188                   | 110                     | 58,5%                   | <b>0,06</b>  | <b>0,04</b>                |
| Keine Kinder <18 J.        | 744                   | 368                     | 49,5%                   | <b>0,08</b>  | <b>0,01</b>                |
| Gesamt                     | 131                   | 77                      | 58,8%                   |              |                            |

| Welle 15                   | Gruppen-<br>größe (N) | Belastung<br>= „Ja“ (n) | Belastung<br>= „Ja“ (%) | Cramers<br>V | Näherungsw.<br>Signifikanz |
|----------------------------|-----------------------|-------------------------|-------------------------|--------------|----------------------------|
| Eltern von Kindern 0-5 J.  | 162                   | 58                      | 35,8%                   | <0,01        | 0,97                       |
| Eltern von Kindern 6-17 J. | 184                   | 86                      | 46,7%                   | <b>0,11</b>  | <b>&lt;0,01</b>            |
| Keine Kinder <18 J.        | 698                   | 229                     | 32,8%                   | <b>0,09</b>  | <b>&lt;0,01</b>            |
| Gesamt                     | 993                   | 354                     | 35,6%                   |              |                            |

| Welle 34                   | Gruppen-<br>größe (N) | Belastung<br>= „Ja“ (n) | Belastung<br>= „Ja“ (%) | Cramers<br>V | Näherungsw.<br>Signifikanz |
|----------------------------|-----------------------|-------------------------|-------------------------|--------------|----------------------------|
| Eltern von Kindern 0-5 J.  | 154                   | 97                      | 63,0%                   | 0,050        | 0,11                       |
| Eltern von Kindern 6-17 J. | 171                   | 90                      | 52,6%                   | 0,041        | 0,19                       |
| Keine Kinder <18 J.        | 716                   | 408                     | 57,0%                   | 0,005        | 0,87                       |
| Gesamt                     | 1001                  | 572                     | 57,1%                   |              |                            |

**Tabelle A3: Vergleich der Belastung innerhalb der Hauptgruppen zwischen den Wellen 5, 15 und 34, inkl. Odds Ratios (OR) und 95% Konfidenzintervallen (95% KI). Signifikante Ergebnisse in fett gedruckt ( $p < 0.05$ ).**

|                            | Welle 15 vs. 5 |                    | Welle 34 vs. 5 |                    | Welle 34 vs. 15 |                    |
|----------------------------|----------------|--------------------|----------------|--------------------|-----------------|--------------------|
|                            | OR             | 95% KI             | OR             | 95% KI             | OR              | 95% KI             |
| Eltern von Kindern 0-5 J.  | <b>0,39</b>    | <b>(0,24-0,63)</b> | 1,19           | (0,74-1,92)        | <b>3,05</b>     | <b>(1,93-4,83)</b> |
| Eltern von Kindern 6-17 J. | <b>0,62</b>    | <b>(0,41-0,94)</b> | 0,79           | (0,52-1,20)        | 1,27            | (0,83-1,92)        |
| Keine Kinder <18 J.        | <b>0,50</b>    | <b>(0,40-0,62)</b> | <b>1,35</b>    | <b>(1,10-1,66)</b> | <b>2,71</b>     | <b>(2,19-3,37)</b> |
| Gesamt                     | <b>0,51</b>    | <b>(0,43-0,62)</b> | <b>1,24</b>    | <b>(1,04-1,48)</b> | <b>2,41</b>     | <b>(2,01-2,88)</b> |

**Tabelle A4: Multivariate logistische Regression für die Belastung in verschiedenen Subgruppen von Eltern mit Kindern im Schulalter mit den Kovariablen Alter, Geschlecht, Schulbildung und Migrationshintergrund. OR: Odds Ratios. 95% KI: 95% Konfidenzintervall. Signifikante Ergebnisse sind fett gedruckt.**

|                               | Welle 5 (31. März/1. April 2020) |      |             | Welle 15 (23./24. Juni 2020) |             |                    | Welle 34 (26./27. Januar 2021) |      |             |
|-------------------------------|----------------------------------|------|-------------|------------------------------|-------------|--------------------|--------------------------------|------|-------------|
|                               | Belastung = "Ja" (%)             | OR   | 95% KI      | Belastung = "Ja" (%)         | OR          | 95% KI             | Belastung = "Ja" (%)           | OR   | 95% KI      |
| Gesamt                        | 58,5%                            |      |             | 46,7%                        |             |                    | 52,6%                          |      |             |
| <b>Alter (kontinuierlich)</b> |                                  | 1,00 | (0,96-1,03) |                              | 1,02        | (0,98-1,05)        |                                | 1,00 | (0,97-1,03) |
| <b>Geschlecht</b>             |                                  |      |             |                              |             |                    |                                |      |             |
| Männlich (Ref.)               | 56,0%                            | -    | -           | 49,4 %                       | -           | -                  | 45,9 %                         | -    | -           |
| Weiblich                      | 61,4%                            | 1,20 | (0,66-2,18) | 44,2 %                       | 0,79        | (0,44-1,43)        | 59,3 %                         | 1,70 | (0,92-3,16) |
| <b>Dauer der Schulbildung</b> |                                  |      |             |                              |             |                    |                                |      |             |
| Bis zu 9 Jahren               | 57,1%                            | 0,90 | (0,30-2,82) | 38,5 %                       | 0,69        | (0,21-2,30)        | 50,0 %                         | 0,79 | (0,25-2,54) |
| Mind. 10 Jahre, ohne Abitur   | 61,5%                            | 1,17 | (0,60-2,28) | 50,7 %                       | 1,30        | (0,69-2,44)        | 50,9 %                         | 0,87 | (0,44-1,70) |
| Abitur (Ref.)                 | 57,4 %                           | -    | -           | 45,2 %                       | -           | -                  | 53,9 %                         | -    | -           |
| <b>Migrationshintergrund</b>  |                                  |      |             |                              |             |                    |                                |      |             |
| Bekannt                       | 68,8%                            | 1,72 | (0,76-3,91) | 61,3 %                       | <b>2,34</b> | <b>(1,03-5,34)</b> | 69,2 %                         | 2,20 | (0,89-5,42) |
| Nicht bekannt (Ref.)          | 56,8%                            | -    | -           | 43,8 %                       | -           | -                  | 49,7 %                         | -    | -           |
| <b>Pseudo-R<sup>2</sup></b>   |                                  |      | 0,018       |                              |             | 0,042              |                                |      | 0,050       |

**Tabelle A5: Vergleich elternspezifischer Belastungen zwischen Müttern und Vätern von Kindern im Schulalter in Welle 12 durch den Mann-Whitney-U-Test.** Die Zahl der gültigen Fälle variiert für die letzteren acht Variablen, da nicht alle Aspekte von Elternschaft auf alle Teilnehmenden zutreffen. Signifikante Ergebnisse ( $p < 0.05$ ) sind fett gedruckt.

| Welle 12 (19./20. Mai 2020)                                                             |                   |                     |        |                 |                     |
|-----------------------------------------------------------------------------------------|-------------------|---------------------|--------|-----------------|---------------------|
| Variablen (Kurzbeschreibung)                                                            | Gültige Fälle (n) | Mann-Whitney-U-Test | Z      | asympt. p-Wert  | Korrelationskoef. r |
| Ich fühle mich als Elternteil in der aktuellen Situation überfordert.                   | 184               | 3438,5              | -2,229 | <b>0,03</b>     | 0,16                |
| Die aktuelle Situation bringt unsere Familie an den Rand ihrer Kräfte.                  | 184               | 4126,5              | -0,291 | 0,77            | 0,02                |
| Home-Office und Kinderbetreuung in Einklang zu bringen                                  | 113               | 1181,5              | -2,411 | <b>0,02</b>     | 0,23                |
| Das Kind/die Kinder ohne den Kontakt zu anderen Kindern bei Laune zu halten             | 166               | 2453                | -3,241 | <b>&lt;0,01</b> | 0,25                |
| Das Haus weniger verlassen zu können und Abstand zu halten                              | 167               | 2826,5              | -2,136 | <b>0,03</b>     | 0,17                |
| Die schulische Bildung des Kindes/der Kinder zu Hause zu organisieren.                  | 163               | 2342                | -3,297 | <b>&lt;0,01</b> | 0,26                |
| Jedem Kind eigene Zeit und eigenen Raum zu ermöglichen                                  | 151               | 2229                | -2,349 | <b>0,02</b>     | 0,19                |
| Die Großeltern nicht mehr sehen zu können                                               | 144               | 1765,5              | -3,356 | <b>&lt;0,01</b> | 0,28                |
| Auf familiäre und andere Hilfe im Familienleben (z.B. Babysitter) verzichten zu müssen. | 119               | 1220,5              | -2,927 | <b>&lt;0,01</b> | 0,27                |
| Mir mit meinem Partner/meiner Partnerin in Bezug auf die Kindererziehung einig zu sein. | 148               | 2441,5              | -1,112 | 0,27            | 0,09                |

**Tabelle A6: Vergleich elternspezifischer Belastungen zwischen Müttern und Vätern von Kindern im Schulalter in Welle 30 durch den Mann-Whitney-U-Test.** Die Zahl der gültigen Fälle variiert für die letzteren acht Variablen, da nicht alle Aspekte von Elternschaft auf alle Teilnehmenden zutreffen. Signifikante Ergebnisse ( $p < 0.05$ ) sind fett gedruckt.

| Welle 30 (15./16. Dezember 2020)                                                        |                   |                     |        |                 |                     |
|-----------------------------------------------------------------------------------------|-------------------|---------------------|--------|-----------------|---------------------|
| Variablen (Kurzbeschreibung)                                                            | Gültige Fälle (n) | Mann-Whitney-U-Test | Z      | asympt. p-Wert  | Korrelationskoef. r |
| Ich fühle mich als Elternteil in der aktuellen Situation überfordert.                   | 188               | 3558,0              | -2,34  | <b>0,02</b>     | 0,17                |
| Die aktuelle Situation bringt unsere Familie an den Rand ihrer Kräfte.                  | 188               | 3648,5              | -2,09  | <b>0,04</b>     | 0,15                |
| Home-Office und Kinderbetreuung in Einklang zu bringen.                                 | 122               | 1574,5              | -1,49  | 0,14            | 0,13                |
| Das Kind/die Kinder ohne den Kontakt zu anderen Kindern bei Laune zu halten.            | 165               | 2575,0              | -2,73  | <b>0,01</b>     | 0,21                |
| Das Haus weniger verlassen zu können und Abstand zu halten.                             | 167               | 2736,5              | -2,43  | <b>0,02</b>     | 0,19                |
| Die schulische Bildung des Kindes/der Kinder zu Hause zu organisieren.                  | 165               | 2510,5              | -2,95  | <b>&lt;0,01</b> | 0,23                |
| Jedem Kind eigene Zeit und eigenen Raum zu ermöglichen.                                 | 161               | 2792,0              | -1,53  | 0,13            | 0,12                |
| Die Großeltern nicht mehr sehen zu können.                                              | 148               | 2170,5              | -2,20  | <b>0,03</b>     | 0,18                |
| Auf familiäre und andere Hilfe im Familienleben (z.B. Babysitter) verzichten zu müssen. | 120               | 1411,5              | -2,07  | <b>0,04</b>     | 0,19                |
| Mir mit meinem Partner/meiner Partnerin in Bezug auf die Kindererziehung einig zu sein. | 142               | 2454,0              | -0,257 | 0,80            | 0,02                |
